# Supplementary material for: Katanin regulates dynamics of microtubules and biogenesis of motile cilia
Source: PubMed Central journal article supplement — J Cell Biol. 2007 Sep 10;178(6):1065–79. doi: 10.1083/jcb.200704021 (PMC2064628; doi:10.1083/jcb.200704021), 2007-09-10
Supplement: jcellbiol_jcb.200704021_6.pdf [file jcellbiol_jcb.200704021_6.pdf]

|            |            |            |            |            |             |            |
|------------|------------|------------|------------|------------|-------------|------------|
| TtSpastin  | LQT-DPLVQQ | INLT-MLEKK | NTIKFEDIAG | LKEVKEALYE | SIIYPNLRPD  | IFQGIRAPPR |
| TtFign     | LKGMDOQLID | LIENEIVENA | ANVKWEDIAG | LSSAKESVKE | TIVWPMLNPQ  | IFTGIRAPPK |
| HsFign     | LKNLEPKMIE | LIMNEIMDHG | PPVNWEDIAG | VEFAKATIKE | IVVWPMLRPD  | IFTGLRGPPK |
| XlFign     | LKNIEPKMIE | LIMSEIMDHG | PPLNWDDIAG | LEFAKTTIKE | IVVWPMLRPD  | IFTGLRGPPK |
| DrFign     | LKNFEPKIE  | LIMSEIMDHG | PPVAWDDIAG | LEFAKATIKE | IVVWPMLRPD  | IFTGLRGPPK |
| GgFign     | LKNTDTHLID | LVTNEIINQG | PPVDWDDIAG | LDLVKAVIKE | EVLWPVLRSD  | AFNGLTALPR |
| AtFind     | LRNLEPLRIE | HVSNEIMDRD | PNVRWDDIAG | LEHAKKCVTE | MVIWPLLRPD  | IFKGCRSPGK |
| DmFingCG33 | LAHLDSKMVD | HILGESMHDF | KPVAWEDIAG | LESAKSTFLE | AIIMPLRRPD  | LFTGVRCPDR |
| CeFign     | LKHFDENIIS | LIESEIMSVN | NEIGWADVAG | LEGAKKALRE | IVVLPFKRPD  | VFTGIRAPPK |
| HsSpastin  | FRNVDSNLAN | LIMNEIVDNG | TAVKFDDIAG | QDLAKQALQE | IVILPSLRPE  | LFTGLRAPAR |
| GgSpastin  | FRNVDSNLAN | LILNEIVDSG | PAVKFDDIAG | QELAKQALQE | IVILPSLRPE  | LFTGLRAPAR |
| XlSpastin  | LRNVDSNLAN | LILNEIVDSG | PSVKFADIAG | QDLAKQALQE | IVILPSIRPE  | LFTGLRAPAR |
| DrSpastin  | FKNVDSKLAS | LILNEIVDSG | SVVRFDDIAG | QDLAKQALQE | IVILPALRPE  | LFTGLRAPAR |
| DmSpastin  | VKGVQKLQV  | LILDEIVEGG | AKVEWTDIAG | QDVAKQALQE | MVILPSVRPE  | LFTGLRAPAK |
| OsSpastin  | GANYDDKLVE | MINTTIVDRS | PAVKWEDVAG | LDKAKQALME | MVILPTKRRD  | LFTGLRRPAR |
| AtSpastin  | GNVYDDKLVE | MINTTIVDRS | PSVKWDDVAG | LNGAKQALLE | MVILPAKRRD  | LFTGLRRPAR |
| CeSpastin  | LNGVDKVICE | RLLDEVLDNT | G-VRMDDVAG | CHSAKAALRE | AVILPALNPN  | LFKGLRQPVK |
| Sc         | VQGVDRNACE | QILNEILVTD | EKVYWEDIAG | LRNAKNSLKE | AVVYPFLRPD  | LFKGLREPVR |
| Sp         | QTPSSDFEY  | AIMNEIISNH | EPVYWSDIAG | LDDAKNSLKE | AVIYPFLRPE  | LFQGLREPVO |
| HsVPS      | DNPEKKKLQE | QLMGAVVMEK | PNIRWWDVAG | LEGAKEALKE | AVILPIKFPH  | LFTGKRTPWR |
| XlVPS      | ENPEKKKLQE | QLMGAVVMEK | PNVRWWDVAG | LEGAKEALKE | AVILPIKFPH  | LFTGKRTPWR |
| GgVPS      | EDPEKKKLQN | QLQGAIVMER | PNVKWSDVAG | LEGAKEALKE | AVILPIKFPH  | LFTGKRTPWR |
| DrVPS      | EDPEKKKFQN | QLSGAIVMEK | PNIKWWDVAG | LEGAKEALKE | AVILPIKFPD  | LFTGKRTPWR |
| DmVPS      | DDPEKKKLQS | KLEDAIVIEK | PKVQWSDVAG | LDAAKEALKE | AVILPIKFPQ  | LFTGKRIPWK |
| CeVPS      | EDEDKKKFQD | KLSGAIVMEK | PNVKWTDIAG | LEGAKEALKE | AVILPIKFPQ  | LFTGNRKPWQ |
| ScVPS      | GGEDNKKLRG | ALSSAILSEK | PNVKWEDVAG | LEGAKEALKE | AVILPVKFPH  | LFKGNRKPWS |
| SpVSP      | LDSDAKKLRS | ALTSAILVEK | PNVRWDDIAG | LENAKEALKE | TVLLPIKLPQ  | LFSHGRKPWS |
| AtVSP      | EDPEQSKLRA | GLNSAIVREK | PNIKWSDVAG | LESAKQALQE | AVILPVKFPQ  | FFTGKRRPWR |
| TtVSP1     | NKDENTKFKE | ALQETIVPEK | PNIKWDDIAG | LVKAKESLKE | AVILPIRFPE  | IFKGARKPWK |
| TtVSP2     | GDKDNAKFEQ | ALGEAIVTEK | PNVHWSVAG  | LENAKALNE  | AVILPIRFPH  | IFQGMIPKWR |
| TtVSP3     | TLKYIQDLKR | SLKNCIVKKK | PNVTFNDIAG | NEYAKKQIQQ | SFKLPLLYPN  | LFSGQPSPWR |
| TtVSP4     | QKYLKDLKS  | QLKSCILTCK | PPIKFKDIAG | NDYAKKCIIE | NFILPSVLPN  | LFQGKPKPFN |
| AtKat1     | YEGPDEDLAA | MLERDVLDST | PGVRWDDVAG | LSEAKRLLE  | AVVLPPLWMPD | YFQGIIRPWK |
| OsKat1     | YEGPDMDLAA | MLERDVLDST | PGVRWDDVAG | LSEAKRLLE  | AVVLPPLWMPD | YFQGIIRPWK |
| HsKat1     | STGYDKDLVE | ALERDIISON | PNVRWDDIAD | LVEAKKLLKE | AVVLPMLWMPD | FFKGIRRPWK |
| MmKat1     | GTGYDKDLVE | ALERDIISON | PNVRWYDIAD | LVEAKKLLQE | AVVLPMLWMPD | FFKGIRRPWK |
| GgKat1     | STGYDKDLVE | ALERDIISON | PNIRWDDIAD | LVEAKKLLKE | AVVLPMLWMPD | FFKGIRRPWK |
| XlKat1     | SGGYDKDLIE | ALERDIISON | PNIRWDDIAD | LEEAKKLLKE | AVVLPMLWMPD | FFKGIRRPWK |
| DrKat1     | RGGEDKDLID | ALERDIISON | PNVTWDDIAD | LEEAKKLLKE | AVVLPMLWMPD | FFKGIRRPWK |
| HsKat1L    | GAGYDKDLVE | ALERDIVSRN | PSIHWDDIAD | LEEAKKLLRE | AVVLPMLWMPD | FFKGIRRPWK |
| MmKat1L    | GAGYDKDLVE | ALERDIVSRN | PSIHWDDIAD | LEEAKKLLRE | AVVLPMLWMPD | FFKGIRRPWK |
| GgKat1L    | GAGYDKDLVE | ALERDIVSRN | PSIHWDDIAD | LEEAKKLLRE | AVVLPMLWMPD | FFKGIRRPWK |
| DrKat1L    | GTGYDSDLVD | ALERDIVSRN | PSIHWDDIAD | LEDAKLLRE  | AVVLPMLWMPD | FFKGIRRPWK |
| DmKat1LCG1 | NNHIEAELVD | ILERDILQKD | PKVRWSDIAD | LHDAKRLLE  | AVVLPMLMPD  | YFKGIIRPWK |
| CrKat1     | YSGPDQELAA | MLERDIVDQG | TSVKWDDIAG | LEEAKRVLNE | ALVLPMLMPD  | FFTGIIRPVK |
| TbKat1     | PRSGEEELVA | LIEADMHVGS | LSVGWEDVAG | LQDAKGLLE  | AVVYPVLMPE  | YYQGIIRPWK |
| TcKat1     | ARAGEEELVS | LIESDMNAGP | MKVSWDDIAG | LEEAKGLLE  | AVVYPVLMPE  | YFQGIIRPWK |

|            |             |             |            |            |             |             |
|------------|-------------|-------------|------------|------------|-------------|-------------|
| LmKat1     | GRAGEEELVQ  | LIEADMHV GK | LPVTWDDIAG | LEEAKRLLEE | AVVYPVLM PD | YYQGIRRPWK  |
| DmKat1CG11 | PLGYEVHLVD  | TLEKDILQRH  | PCIKWTDVAG | LNEAKTILQE | AVVLPVIMPE  | FFKGIRRPWR  |
| TbKat3     | PPGIAPELLE  | RIEAEIERS   | PNVEWDDIAG | IPEAKRLLKE | AIILPLLVE   | LFTGVVQPWK  |
| TcKat3     | PSGINAEFAD  | RIESEIERS   | PNVQWEDIAG | IPDAKRLLKE | AVILPLLVE   | LFTGVVQPWK  |
| OsKat2     | -SAEMRNLA E | TLLRDIIRGS  | PDVKWESIKG | LENAKRLLKE | AVVMPIKYPK  | YFTGLLSPWK  |
| OsKat3     | -SAEMRNLA E | TLLRDIIRGS  | PDVKWESIKG | LENAKRLLKE | AVVMPIKYPK  | YFKGLLSPWK  |
| AtKat2     | -SAETRTLAE  | SLSRDIIRGN  | PNIKWESIKG | LENAKLLKE  | AVVMPIKYPT  | YFNGLLTPWK  |
| HsKat2     | MNSEMRELA A | VVSRDIYLHN  | PNIKWNDIIG | LDAAKQLVKE | AVVYPIRYPQ  | LFTGILSPWK  |
| MmKat2     | MNSEMRELA A | VVSRDIYLHN  | PNIKWNDIIG | LDAAKQLVKE | AVVYPIRYPQ  | LFTGILSPWK  |
| GgKat2     | MNGEMRELAT  | VVSKDIYLHN  | PNVKWDDIIG | LDAAKRLVKE | AVVYPIRYPQ  | LFTGILSPWK  |
| XlKat2     | GNSEMRELA A | VISRDIYLQN  | PNVRWDDIIG | LDAAKRLVKE | AVVYPIRYPQ  | LFTGILSPWK  |
| DrKat2     | MNSDMKELAA  | VISRDIYLHN  | PNVRWDDIIG | LEAAKRLVKE | AVVYPIKYPQ  | LFTGILSPWK  |
| CrKat2     | LQGELRELGA  | AITRDIFTDS  | PNVRWEDIAG | LDSAKRLIKE | AVVMPIKYPQ  | LFTGLLAPWK  |
| TbKat2     | PTVELQELAM  | TIQRDILDSN  | PNVRWGSIAA | LDEVKRLLE  | AVVMPVKYPE  | LFAGIVRPWK  |
| TcKat2     | LSVEQQELAM  | TIQRDILDVN  | PNVRWSAIAE | LDQAKQLLE  | AVVMPVKYPE  | LFSGILRPWK  |
| LmKat2     | PTSELSELAA  | TILREILDVD  | PSVRWRDIAD | LENAKHLLE  | AVVMPVKYPG  | LFQGILRPWK  |
| TtKat2     | DVQELKELAA  | YLQRDILVEN  | PNVKFKDIVG | LDDAKRLLKE | AVQIPLKYPH  | FFTGILEPWR  |
| PtKat2     | DVPEFQQLAA  | YLQRDICSEN  | PNVKFSDIAG | LDQAKRLLKE | AVLVPLKYPH  | FFQGILEPWK  |
| DmKat2     | SSLEWQSLAE  | LVKTSILQEN  | IKIKWSDVCG | NQRAIELIKE | AVLTPIEFPQ  | LFAGHLKPWR  |
| TtKat1     | GQGPDSDLIA  | MLERDVVDQN  | PNISFDQIAE | LDKAKDMLQE | AVLLPILIPQ  | YFRGIRRP LK |
| PtKat1     | GRGPDSDLIQ  | MIEREVL DLT | PNVSFEQIAE | LELAKDTLQE | AVLLPIFMPQ  | IFTGIRRPCK  |
| CeKalmei1  | SAYDAYIVQA  | VRGTMATNTE  | NTMSLDDIIG | MHDVKQVLHE | AVTLPLLVE   | FFQGLRSPWK  |

|            |            |             |            |            |            |
|------------|------------|-------------|------------|------------|------------|
| GILLFGPPGN | GKTLIAKAVA | TESNATFYNI  | SASNLMSKNL | GEGEKLVKAL | FQCAYVNQPS |
| GLLLFGPPGT | GKTMIGKAIA | NQSGSTFFSI  | SASSLTSKYI | GEGEKMVKIL | FKLAEMRQPS |
| GILLFGPPGT | GKTLIGKCIA | SQSGATFFSI  | SASSLTSKWV | GEGEKMVRAL | FAVARCQOPA |
| GILLFGPPGT | GKTLIGKCIA | CQSGATFFSI  | SASSLTSKWV | GEGEKMVRAL | FTVARCHQPA |
| GILLFGPPGT | GKTLIGKCIA | CQSGATFFSI  | SASSLTSKWV | GEGEKMVRAL | FAIARCHQPA |
| SILLFGPRGT | GKTLMGRCIA | SQLGATFFKI  | TGSGLVTKWL | GEGEKIVHAS | FLVARCRQPS |
| GLLLFGPPGT | GKTMIGKAIA | GEAKATFFYI  | SASSLTSKWI | GEGEKLVRAL | FGVASCROPA |
| GVLLFGPPGT | GKTLIAKSIA | SQAKAKFFSI  | NPSSLTSKWV | GDAEKLVKTL | FAVAAAHQPA |
| GVLLFGPPGT | GKTMIGRCVA | SQCKATFFNI  | SASSLTSKWV | GEGEKLVRAL | FVARLKLPS  |
| GLLLFGPPGN | GKTMLAKAVA | AESNATFFNI  | SAASLTSKYV | GEGEKLVRAL | FAVARELQPS |
| GLLLFGPPGN | GKTMLAKAVA | AESNATFFNI  | SAASLTSKYV | GEGEKLVRAL | FAVARELQPS |
| GLLLFGPPGN | GKTMLAKAVA | AESNATFFNI  | SAASLTSKYV | GEGEKLVRAL | FVARELQPS  |
| GLLLFGPPGN | GKTMLAKAVA | MESNATFFNI  | SAATLTSKYV | GEGEKLVRAL | FAVARELQPS |
| GLLLFGPPGN | GKTLLARAVA | TECSATFLNI  | SAASLTSKYV | GDGEKLVRAL | FAVARHMQPS |
| GLLLFGPPGN | GKTMLAKAVA | SESEATFFNV  | SASSLTSKWV | GAEKLVRTL  | FMVAVDRQPS |
| GLLLFGPPGN | GKTMLAKAVA | SESQATFFNV  | SASSLTSKWV | GAEKLVKTL  | FQVAISRQPS |
| GILLFGPPGN | GKTLLAKAVA | GESKQMF FNI | SASSLTSKWV | GDSEKTIRGL | FQIARNAQPS |
| GMLLFGPPGT | GKTMIAKAVA | TESNSTFFSV  | SASSLLSKYL | GESEKLVRAL | FYMAKKLSPS |
| GMLLFGPPGT | GKTMLARAVA | TEAKATFFSI  | SASSLTSKYL | GDSEKLVRAL | FEVAKROTCS |
| GILLFGPPGT | GKSYLAKAVA | TEANSTFFSV  | SSSDLMSKWL | GESEKLVKNL | FELARQHKPS |
| GILLFGPPGT | GKSYLAKAVA | TEANSTFFSV  | SSSDLMSKWL | GESEKLVKNL | FELARQHKPS |
| GILLFGPPGT | GKSYLAKAVA | TEANSTFFSV  | SSSDLVSKWL | GESEKLVKNL | FQLARENKPS |
| GILLFGPPGT | GKSYLAKAVA | TEANSTFFSI  | SSSDLVSKWL | GESEKLVKSL | FTLAREHKPS |
| GILLFGPPGT | GKSYLAKAVA | TEANSTFFSV  | SSSDLMSKWL | GESEKLVKNL | FELARQHKPS |
| GILLFGPPGT | GKSYIAKAVA | TEAGSTFFSI  | SSSDLMSKWL | GESEKLVKNL | FALAREHKPS |

|            |            |            |            |            |            |
|------------|------------|------------|------------|------------|------------|
| GILLYGPPGT | GKSYLAKAVA | TEANSTFFSV | SSSDLVSKWM | GESEKLVKQL | FAMARENKPS |
| GILLYGPPGT | GKSYLAKAVA | TEAGSTFFSI | SSSDLVSKWM | GESERLVRQL | FEMAREQKPS |
| AFLLYGPPGT | GKSYLAKAVA | TEADSTFFSV | SSSDLVSKWM | GESEKLVSNL | FEMARESAPS |
| GILLYGPPGT | GKTYLAKACA | TETEGTFFSV | SSADLVSKYV | GESEKLIKNL | FALAREKKPS |
| GILLYGPPGT | GKTFLAKACA | TECDATFFSI | SSSDLISKWV | GESEKLIKTL | FKMAREKKPS |
| KILLYGPPGV | GKTMLAQAIC | NEFYFTILQV | SLVDITSKFV | GESEKLLRML | MDLAREHSPS |
| KILLYGPPGV | GKTMICHAVC | NELQATPFVW | SLADITSKFI | GESEKLLKML | FDLARENSPS |
| GVLVFGPPGT | GKTLLAKAVA | TECGTTFNFV | SSATLASKWR | GESERMVRCL | FDLARAYAPS |
| GVLVFGPPGT | GKTLLAKAVA | TECGTTFNFV | SSATLASKWR | GESERMVRCL | FDLARFYAPS |
| GVLVVGPPGT | GKTLLAKAVA | TECKTTFNFV | SSSTLTSKYR | GESEKLVRL  | FEMARFYSPA |
| GVLVVGPPGT | GKTLLAKAVA | TECKTTFNFV | SSSTLTSKYR | GESEKLVRL  | FEMARFYSPA |
| GVLVVGPPGT | GKTLLAKAVA | TECKTTFNFV | SSSTLTSKYR | GESEKLVRL  | FEMARFYAPT |
| GVLVVGPPGT | GKTLLAKAVA | TECKTTFNFI | SSSTLTSKYR | GESEKLVRL  | FEMARFYAPT |
| GVLVVGPPGT | GKTLLAKAVA | TECRTTFNFV | SSSTLTSKYR | GESEKLVRL  | FEMARFYAPT |
| GVLVVGPPGT | GKTMLAKAVA | TECGTTFNFV | SSSTLTSKYR | GESEKLVRL  | FEMARFYAPT |
| GVLVVGPPGT | GKTMLAKAVA | TECGTTFNFV | SSSTLTSKYR | GESEKLVRL  | FEMARFYAPT |
| GVLVVGPPGT | GKTMLAKAVA | TECGTTFNFV | SSSTLTSKYR | GESEKLVRL  | FEMARFYAPA |
| GVLVVGPPGT | GKTMLAKAVA | TECGTTFNFV | SSSTLTSKYR | GESEKLVRL  | FEMARFYAPT |
| GVLVVGPPGT | GKTMLAKAVA | TECGTTFNFV | SSATLTSKYR | GESEKLVRL  | FEMARFYAPS |
| GVLVVGPPGT | GKTMLAKAAA | TETSCTFNFV | SSATLASKYR | GESERMVRIL | FEMARDLAPS |
| GVLVVGPPGT | GKTMLAKAVA | AECNTTFNFI | SPATLTSKWR | GDSEKLIRVL | FEMARHYAPS |
| GVLVVGPPGT | GKTMLAKAVA | SECSTTFNFI | SPATLTSKWR | GDSEKLIRVL | FEMARHYAPS |
| GVLVVGPPGT | GKTMLAKAVA | SECNTTFNFI | SPATLTSKWR | GDSEKLIRVL | FEMARHYAPS |
| GVLVVGPPGT | GKTMLAKAVA | TECGTTFNFV | SSSTLTSKYR | GESEKLVRL  | FEMARFYAPS |
| GVLVVGPPGT | GKTMLARAVA | TSAKTTFNFI | SASSLISKYF | GESEKIVRSL | FHLARHYAPS |
| GVLVVGPPGT | GKTMLARAVA | TSAKTTFNFI | SASTLISRYF | GESEKIVRSL | FQLARHYAPS |
| GILLFGPPGT | GKTMLAKAVA | TECKTTFNFI | SASSIVSKWR | GDSEKLVKVL | FELARHHAPS |
| GILLFGPPGT | GKTMLAKAVA | TECKTTFNFI | SASSIVSKWR | GDSEKLVKVL | FELARHHAPS |
| GILLFGPPGT | GKTMLAKAVA | TECNTTFNFI | SASSVSKWR  | GDSEKLIRVL | FDLARHHAPS |
| GILLYGPPGT | GKTLLAKAVA | TECKTTFNFI | SASTIVSKWR | GDSEKLVRL  | FELARYHAPS |
| GILLYGPPGT | GKTLLAKAVA | TECKTTFNFI | SASTIVSKWR | GDSEKLVRL  | FELARYHAPS |
| GILLYGPPGT | GKTLLAKAVA | TECNTTFNFI | SASTIVSKWR | GDSEKLVRL  | FELARYHAPS |
| GILLYGPPGT | GKTLLAKAVA | TECNTTFNFI | SASTIVSKWR | GDSEKLVRL  | FELARYHAPS |
| GILLYGPPGT | GKTLLAKAVA | TECNTTFNFI | SASTIVSKWR | GDSEKLVRL  | FELARYHAPS |
| GILLYGPPGT | GKTMLAKAVA | TECNTTFNFI | SASSIVSKWR | GDSEKLVRL  | FELARYHAPS |
| GVLVVGPPGT | GKTLLAKAVA | TECRTTFNFI | SASSIISKWR | GDSEKLVRL  | FELARYHAPS |
| GILLFGPPGT | GKTLLAKAVA | TECRTTFNFI | SASSVSKWR  | GDSEKLVRL  | FDIAVHYAPS |
| GILLFGPPGT | GKTLLAKAVA | TECRTTFNFI | SASSVSKWR  | GDSEKLVRL  | FDLAVHYAPS |
| GILLFGPPGT | GKTLLAKAVA | TECRTTFNFI | AASSVSKWR  | GDSEKLVRL  | FDLAVHYAPS |
| GVLVVGPPGT | GKTMLAKAVA | TECGTTFNFI | SASSVSKWR  | GESEKLIRVL | FELARHYQPS |
| GVLVVGPPGT | GKTMLAKAVA | TECRTTFNFV | QASSVSKWR  | GESEKLIRVL | FDLARHYEPS |
| SLLHGGPPGS | GKTLLAKALY | SETQVTFNFI | TASIMVSKWR | GESEKILRVL | FHMAAKRAPS |
| GVLVFGPPGT | GKTMLAKAVA | TTGKTTFNFV | SASSLASKWR | GDSEKLVRL  | FEMARYYAPS |
| GVLVVGPPGT | GKTMLAKAVA | TTGKTTFNFV | SACTLASKWK | GESEKLVRL  | FEMAKFYAPS |
| AMVLGPPGT  | GKTLIARIAI | SESSSTFFTV | SSTDLSKWR  | GDSEKIVRLL | FELARFYAPS |
| IIFIDEIDSI | LKARCEN-EH | EASRLKTEF  | LIQFDGANSS | DDRVIVIGAT | NRPQEIDSAA |
| VIFIDEIDSL | LCARQEN-EN | EASRRIKTEF | LVQMEGATSR | EVRLLLIGAT | NRPQELDDAV |
| VIFIDEIDSL | LSQRGDG-EH | ESSRRIKTEF | LVQLDGATTS | SDRILVVGAT | NRPQEIDEAA |

VIFIDEIDSL LSQRGEG-EH ESSRRIKTEF LVQLDGATTS SDRILVVGAT NRPQEIDEAA  
VIFIDEIDSL LSQRTDG-EH DSSRRIKTEF LVQLDGAATS ADRILVVGAT NRPQEIDEAA  
VIFVSDIDML LSSQVSE-EH SPVSRMRTEF LMQLDVTULTS ADQIVVICAT SKPEEIDESL  
VIFVDEIDSL LSQRKSDGEH ESSRRLKTQF LIEMEGFDSG S-QILLIGAT NRPQELDEAA  
IIFIDEVDSL LSKRSAN-EN ESTLRLKNEF LIHLDDGAASN EIRVLVIGAT NRPQELDEAV  
VIFIDEIDSL LSSRSES-EH ESSRRIKTEF LVQLDGVNTA PERLLVLGAT NRPQELDEAA  
IIFIDEVDSL LCERREG-EH DASRRLKTEF LIEFDGVQSA GDRVLVMGAT NRPQELDEAV  
IIFIDEVDSL LCERREG-EH DASRRLKTEF LIEFDGVQSS GDRILVMGAT NRPQELDDAV  
IIFIDEVDSL LCERREG-EH DASRRLKTEF LIEFDGVQSG GDRVLVMGAT NRPQELDDAV  
IIFIDEIDSL LCERREG-EH DASRRLKTEF LIEFDGVQSG GERVLVMGAT NRPQELDEAV  
IIFIDEVDSL LSERSSS-EH EASRRLKTEF LVEFDGLPGN PDRIVVLAAT NRPQELDEAA  
VIFMDEIDSV MSARLAN-EN DASRRLKSEF LIQFDGVTSN PDLVIVIGAT NKPQELDDAV  
VIFMDEIDSI MSTRSTS-EN EASRRLKSEF LIQFDGVTSN PDLVIIIGAT NKPQELDDAV  
IIFIDEIDSI LCERSEK-DA EVSRMKTEF LVQFDGATSS ADRILVIGAT NRPHELDDAV  
IIFIDEIDSM LTARSDN-EN ESSRRIKTEL LIQWSSLSSA TSRVLVLGAT NLPWAIDDAA  
VIFVDEIDSI LSARNDGGEH ESSRRLKTEF LIQWSSLTNA APRVLVLAAT NLPWCIDEAA  
IIFIDEVDSL CGSRNEN-ES EAARRIKTEF LVQMQGVGNN NDGTLVLGAT NIPWVLDSAI  
IIFIDEVDSL CGSRNEN-ES EAARRIKTEF LVQMQGVGNN NDGILVLGAT NIPWVLDSAI  
IIFIDEIDSL CGSRSEN-ES EAARRIKTEF LVQMQGVGVD NEGILVLGAT NIPWVLDSAI  
IIFIDEIDSL CGSRSEN-ES EAARRIKTEF LVQMQGVGND NEGILVLGAT NIPWTLDSAI  
IIFIDEIDSM CSARSDN-EN DSVRRIKTEF LVQMQGVGND TDGILVLGAT NIPWVLDSAI  
IIFIDEIDSL CSARSDN-ES ESARRIKTEF MVQMQGVGLN NDGILVLGAT NIPWILDSAI  
IIFIDEVDAL TGTRGEG-ES EASRRIKTEL LVQMNGVGND SQGVLVLGAT NIPWQLDSAI  
IIFIDEIDSL CGSRSEG-ES ESSRRIKTEF LVQMNGVGKD ESGVLVLGAT NIPWTLDSAI  
IIFVDEIDSL CGTRGEGNES EASRRIKTEL LVQMQGVGHN DEKVLVLAAT NTPYALDQAI  
IIFIDEVDSL CGNRSDG-EN DASRRVKTEF LVQMQGVGND DQGVLVLGAT NLPWALDPAI  
IIFIDEIDSM TGNRSEG-EN EASRRVKTEF LVQMQGVGND DTGVLVLGAT NVPWGLDPAI  
IIILDEMDSI GRKRND-EN ETERRIKTEF LKQLDDIQND KKNVNIVAIT NMPWELDIIV  
IIIFDEMDSI GRKRNGS-ES ETERRIKTEF LKQLDEINSL DK-VYILATT NMPWELDVAV  
TIFIDEIDSL CNSRGGSGEH ESSRRVKSEL LVQVDGVSNT AKIVMVLAAT NFPWDIDEAL  
TIFIDEIDSL CTSRGASGEH ESSRRVKSEL LVQIDGVNNS SKIVMVLAAT NFPWDIDEAL  
TIFIDEIDSI CSRRGTSEEH EASRRVKAEL LVQMDGVGGT SKMVMVLAAT NFPWDIDEAL  
TIFIDEIDSI CSRRGTSEEH EASRRMKAEL LVQMDGVGGA SKMVMVLAAT NFPWDIDEAL  
TIFIDEIDSI CSRRGTSEEH EASRRVKAEL LVQMDGVGGA TKMVMVLAAT NFPWDIDEAL  
TIFIDEIDSI CSRRGTSEEH EASRRVKAEL LVQMDGVGGA SKMVMVLAAT NFPWDIDEAL  
TIFIDEIDSI CSRRGTSEEH EASRRVKAEL LVQMDGVGGT SKMVMVLAAT NFPWDIDEAL  
TIFIDEIDSI CSRRGTSDEH EASRRVKSEL LIQMDGVGGA LKMVMVLAAT NFPWDIDEAL  
TIFIDEIDSI CSRRGTSDEH EASRRVKSEL LIQMDGVGGA LKMVMVLAAT NFPWDIDEAL  
TIFIDEIDSI CSRRGTSDEH EASRRVKSEL LVQMDGVGGA LKMVMVLAAT NFPWDIDEAL  
TIFIDEIDSI CGRRGTSDEH EASRRVKSEL LVQMDGVGGA QKMVMVLAAT NFPWDIDEAL  
TIFIDEIDSL CSRRGSESEH EASRRVKSEL LVQMDGVGGG EKVMVLAAT NFPWDIDEAL  
MIFIDEVDSL CSQRGTANEH EASRRVKTEL LTQVDGVHGS EKHFVLAAT NFPWDIDEAL  
TIFVDEIDAV CSQRGESSEH EASRRAKGTL LAQMDGLSVD PKTVMVLGAT NHPWSIDEAM  
TIFIDEIESL CGHRGDGGEH EASRRAKGTL LTQMDGVGVD TKIVMVLAAT NHPWSIDEAM  
TIFIDEIDSL CGQRGGGNEH EASRRAKGTL LAQMDGVGVD TKIVMVLAAT NHPWDIDEAM  
TIFIDEIDAL CASRGSSEH EASRRFKAEL LIQMDGLNAS -KVIMVLAAT NHPWDIDEAF  
TIFFDEVDAL MSARGGN-EH EASRRIKSEM LQQFDGLCTE NKRVLVLATT NRPWDLDEAM  
TIFFDEVDAL MSSRGGN-EH EASRRVKSEM LQQIDGLSTE SRRVMVLATT NRPWDLDEAM

|            |            |            |            |            |            |
|------------|------------|------------|------------|------------|------------|
| TIFLDEIDAI | ISQGEAREH  | EASRRLKTEL | LIQMDGLTKT | NDLVFVLAAT | NLPWELDAAM |
| TIFLDEIDAI | ISQGEAREH  | EASRRLKTEL | LIQMDGLTKT | DDLVFVLAAT | NLPWELDAAM |
| TIFLDEIDAI | ISQGGEGEH  | EASRRLKTEL | LIQMDGLQKT | NELVFVLAAT | NLPWELDAAM |
| TIFLDELESV | MSQRTASEH  | EGSLRMKTEL | LVQMDGLARS | EDLVFVLAAS | NLPWELDCAM |
| TIFLDELESV | MSQRGMVPEH | EGSLRMKTEL | LVQMDGLARS | EDLVFVLAAS | NLPWELDCAM |
| TIFLDELESV | MSQRGTISEH | EGSRRMKTEL | LVQMDGLARS | DDLVFVLAAS | NLPWELDSAM |
| TIFLDELESV | MSQRGTGP-- | -----      | -----      | -----      | ----ELDYAM |
| TIFLDELESV | MSQRGVGQDH | EGSRRMKTEL | LVQMDGLARS | NDLVFVLAAS | NLPWELDHAM |
| TVFLDEIDAL | MAARGEGEH  | EASRRMKTEL | LIQMDGLARG | GELVFVLAAT | NLPWELDMAL |
| TIFIDEIDSL | MSARGGEGTH | EGSRRMKTEL | LIQMDGLSKR | REVVFVLAAS | NTPWDLDSAM |
| TIFIDEIDSL | MSSRSGEGMH | EGSRRMKTEL | LIQMDGLSKR | RDVVFVLAAS | NVPWDLDTAM |
| TIFIDEIDSL | MSARSSDGEH | EGSRRMKTEL | LTQMDGLSKR | REVVFVLAAS | NVPWDLDTAM |
| TIFLDELDSI | MSQRKGGDEH | EGSRRMKTEL | LIQLDGLMKN | KERVFLAAS  | NLPWDLDVAM |
| TIFIDEMDSI | MGQRGSAGEH | EGGRRMKTEL | LIQLDGLLKS | KKRVFLAAS  | NLPWDLDIAM |
| VIFFDEIESL | TSKRDRATDH | ESSKRFKNEL | LQLLDGMEHS | LNGVFVLAAS | NLPWDIDEAF |
| TIFFDEIDAI | GSKRVDG-EC | EANRKMKAEM | LIQIDGVSSS | SKQVMVLAAT | NRPWDLDEAL |
| TIFFDEIDAL | GSKRVDG-DG | DSARKVKTQM | LIEMDGVSGA | AKTVMCLAAT | NRPWDLDEAL |
| IIFIDEIDTL | GGQRGNSGEH | EASRRVKSEF | LVQMDGSQNK | FRRVFVLAAT | NIPWELDEAL |

|             |            |             |            |             |            |
|-------------|------------|-------------|------------|-------------|------------|
| LRRFTKRILI  | DVPDENTRLH | LIKYYTKDAV  | TSLNEKQIK- | -ELVKKIDGY  | SCSDIKALVK |
| RRRFVKKLYI  | PLPNMVAREQ | LIRRVIERES  | FDMSDQDIL- | -EVVQATKGF  | SGADMTNLCK |
| RRRLVKRLYI  | PLPEASARKQ | IVINLMSKEQ  | CCLSEEEIE- | -QIVQOSDAF  | SGADMTQLCR |
| RRRLVKRLYI  | PLPEASARKQ | IVVSLMSKEH  | CSLTEQEVE- | -AIVLOADGF  | SGADMTQLCR |
| RRRLAKRLYI  | PLPEAEARRQ | IVTNLMSHEK  | SQLGVDEME- | -KVVQGTGEF  | SGADMTQLCR |
| RRYFMKRLLI  | PLPDSTARHQ | IIVQLLSQHN  | YCLNDKEVA- | -LLVQRTGEF  | SGLDVAHLCO |
| RRRLTKRLYI  | PLPSSEARAW | IIONLLKKDG  | FTLSDDDMN- | -IICNLTEGY  | SGSDMKNLVK |
| RRRFVRRLYV  | PLPTREARQK | IEKLIHQVK   | HNLDVRQVI- | -ELAELTDGY  | SGADVDTLCR |
| RRRFQKRLYI  | ALPEPESRTQ | IVQNLLVGTR  | HDITNHNLE- | -RIRELTDGY  | SGADMRQLCT |
| LRRFIKRVYV  | SLPNEETRLI | LLKNLLCKQG  | SPLTQKELA- | -QLARMTDGY  | SGSDLTALAK |
| LRRFTKRIVYV | SLPNEETRLI | LLKNLLSKQG  | SPLTQKELA- | -QLARMTDGY  | SGSDLTALVK |
| LRRFTKRIVYV | ALPNEETRLV | LLKNLLSKQG  | NPLSEKELT- | -QLSRLTEGY  | SGSDITALAK |
| LRRFAKRIYV  | ALPTEETRLK | LLKNLLSKHR  | NPLSQKELS- | -QLARLTDGY  | SGSDLTSLAK |
| LRRFTKRIVYV | SLPDEQTREL | LLNRLLOKQG  | SPLDTEALR- | -RLAKITDGY  | SGSDLTALAK |
| LRRLVKRIYV  | PLPDPNVRRL | LLKTQLKGQS  | FKLSSHDL-  | -RLAADTEGY  | SGSDLRALCE |
| LRRLVKRIYV  | PLPDSNVRKL | LFKTKLKCQP  | HSLSDGDID- | -KIVKETEGY  | SGSDLQALCE |
| LRRFPKRIML  | NLPDEEARKE | LITKTLKKHN  | DGLISSDIR- | -YIASNTSGF  | SNSDLVALCK |
| RRRFSRKLYI  | PLPDYETRLY | HLKRLMAKQK  | NSLQDLDYE- | -LITEMTEGF  | SGSDLTSLAK |
| RRRFVKRTYI  | PLPEKETRYK | HLSHLLHNQV  | HCLTEEDLE- | -ELVNLTEGY  | SGSDITALAK |
| RRRFKRIYI   | PLPEEAARAQ | MFRHLHGSTP  | HNLTDANIH- | -ELARKTEGY  | SGADISIIVR |
| RRRFKRIYI   | PLPEEAARAQ | MFRHLHGNTP  | RNLSEENV-  | -ELAKKTDGY  | SGADISIIVR |
| RRRFKRIYI   | PLPEDHARAA | MFKLHLHGSTP | NLLTEADYR- | -ELGKRTDGY  | SGADISIIVR |
| RRRFKRIYI   | PLPEEHARSF | MFKLNLGTTT  | NSLTESDFM- | -TLGKKT DGY | SGADISIIVR |
| RRRFKRIYI   | PLPEAHARLV | MFKIHLGNTT  | HVLTEQDLK- | -ELAGKTEGY  | SGADISIVVR |
| RRRFKRIYI   | PLPDIHARKE | MFRIDVGKNY  | NTLTDQDFK- | -VLAERCEGY  | SGYDISILVK |
| RRRFERRIYI  | PLPDLAARTT | MFEINVGDTT  | CVLTKEDYR- | -TLGAMTEGY  | SGSDIAVVVK |
| RRRFKRIYI   | PLPNAHARAR | MFEINVGKIP  | SELTSQDFK- | -ELAKMTDGY  | SGSDISIVVR |
| RRRFDKRIYI  | PLPEAKARQH | MFKVHLGDTT  | HNLTEPDFE- | -YLGOKTEGF  | SGSDVSVVVK |
| RRRFKRIYI   | PLPDQPARKF | LLKHNLKNTT  | NTLKEEDFE- | -RLSQLTDGF  | SGADMSIFVR |

|            |             |             |             |             |             |
|------------|-------------|-------------|-------------|-------------|-------------|
| RRRFEKRIMI | PLPEKEARFQ  | LIDNLLNKTP  | NCITQEERL-  | -YIAERTEGF  | SGSDISILVR  |
| LRRFEKRVLV | PMPNQKFREE  | ILTLILGDKV  | LTKEQR--K-  | -EIAELTLGY  | SGADISTVIN  |
| LRRFERRVLL | PLPKKQARLE  | IFQNFTESKN  | HGLKQQDFD-  | -YLSDLTDGY  | SGSDIVTIIN  |
| RRRLEKRIYI | PLPDFESRKA  | LININLRTV-  | EVASDVNIE-  | -DVARRTEGY  | SGDDLTVNCR  |
| RRRLEKRIYI | PLPNFESRKA  | LININLKTV-  | EVATDVDID-  | -EVARRTEGY  | SGDDLTVNCR  |
| RRRLEKRIYI | PLPSAKGREE  | LLRISLREL-  | ELADDVDLA-  | -SIAENMEGY  | SGADITNVCR  |
| RRRLEKRIYI | PLPSAKGREE  | LLRISLREL-  | ELADDVNLA-  | -SIAENMEGY  | SGADITNVCR  |
| RRRLEKRIYI | PLPSAKGREE  | LLRINLREL-  | ELADDVDLA-  | -NIAEKMEGY  | SGADITNVCR  |
| RRRLEKRIYI | PLPSAKGREE  | LLRINLREL-  | ELADDVNIE-  | -CIAENMDGY  | SGADITNVCR  |
| RRRLEKRIYI | PLPSAKGRVD  | LLKINLREL-  | DLANDVNMD-  | -KIAEQMEGY  | SGADITNVCR  |
| RRRLEKRIYI | PLPTAKGRAE  | LLKINLREV-  | ELDPDIQLE-  | -DIAEKIEGY  | SGADITNVCR  |
| RRRLEKRIYI | PLPTAKGRAE  | LLKISLREV-  | ELDPDVHLE-  | -DIADKTEGY  | SGADITNICR  |
| RRRLEKRIYI | PLPTAKGRAE  | LLKINLREV-  | ELDPDISLE-  | -EIAEKIEGY  | SGADITNVCR  |
| RRRLEKRIYI | PLPTAKGRAE  | LLKINLREV-  | DVASDVDLT-  | -VFAEKIEGY  | SGADITNVCR  |
| RRRLEKRIYI | PLPSDEGREA  | LLKINLREV-  | KVDDSVDLT-  | -YVANELKGY  | SGADITNVCR  |
| RRRLEKRVYI | PLPGQAQRLQ  | LLKINLRDV-  | AVAPDVNLE-  | -AVAGQMDGY  | SGDDITNVCR  |
| RRRLEKRIYI | PLPDYKDRLE  | LFRINTKTL-  | KLSPDVDFD-  | -KLSKMLEGY  | SCADLTNLVR  |
| RRRLEKRIYI | PLPDFNDRVE  | LFRINSKSL-  | KLSPDVDFE-  | -HLSKKLEGY  | SCADITNLVR  |
| RRRLEKRIYI | PLPDAADRVE  | LFKINTKSI-  | KLGSVDVDFV- | -KLSQLEGY   | SGADITNLVR  |
| RRRFEKRIYI | PLPNEGTRSA  | LLKLCLKDV-  | CLSPSLNTG-  | -IIGDELQGY  | SGSDISNVCR  |
| RRRLEKRIYI | PLPKKAGRLS  | LLKKQTATL-  | SLDPSVDLE-  | -EISDRTEGF  | SGADMNLVVR  |
| RRRLEKRIYI | PLPDAEGRME  | LLKKQTSSM-  | SLDPSVDLG-  | -IIAKKTGFG  | SGADLNLVVR  |
| LRRLEKRILV | PLPEAEARHA  | MFEELLPST-  | TSKLEVPYD-  | -TLVEKTEGY  | SGSDIRLVCK  |
| LRRLEKRILV | PLPEQEARHA  | MFEELLPSV-  | PGTMNIPYD-  | -VLVEKTEGY  | SGSDIRLVCK  |
| LRRLEKRILV | PLPDPEARRG  | MFEMLIPSQ-  | PGDEPLPHD-  | -VLVEKSEGY  | SGSDIRILCK  |
| LRRLEKRILV | DLPSREARQA  | MIYHWLPPVS  | ALELHTELEY  | SVLSQETEGY  | SGSDIKLVCR  |
| LRRLEKRILV | DLPSQEARQA  | MIYHVLPPVS  | ALELHTQLEY  | SVLSQETEGY  | SGSDIKLVCR  |
| LRRLEKRILV | DLPNQEARQA  | MIRHWLPPLS  | GVELRTDLDY  | SLVLLETGDY  | SGSDIKLVCK  |
| LRRLEKRILV | DLPSKEARQA  | MIQHWPPIIS  | GVELRMDLDY  | STLGEETGDY  | SGSDIRLVCK  |
| LRRLEKRILV | SLPSAPARQA  | MISHWLPPVS  | GVELRTELDL  | SSVFQETGGY  | SGSDIRLVCK  |
| LRRLEKRILV | PLPNTAARRA  | MFATLL----  | VGRCAPDVSP  | DMLAERTEGY  | SGSDVAVVAK  |
| LRRLEKRILV | GLPTHEARAT  | MFRQILT---  | ASAASADIDW  | NACAAATDGM  | SGADIDVICR  |
| LRRLEKRILV | GLPSHKARAV  | MFRQILT---  | PSASAPDLDW  | NLCAELTEGM  | SGADIDVPCR  |
| LRRLEKRILV | SLPTRDARVL  | MFRLLP---   | NSFAS-DADY  | EACAALTEGM  | SGADIDVPCR  |
| LRRLEKRILV | PLPSKEARQN  | MIEQFLP---  | E-GIAQDLNY  | QEISEALENY  | SGSDIKLLCK  |
| LRRLEKRIYI | PLPDQESRES  | MIRRYIP---  | Q-EMSENLY   | PQFAEALKNY  | SGSDIKLVCK  |
| LRRFEKLLV  | QLPNAAERSC  | LINRLLG---  | SSISLNPRL   | EQLVEISDHF  | TGDEIRLACK  |
| RRRLEKRILI | PLPSTTEGRKQ | LFELNMR---  | GIKCSDIDW   | VELVGKTDGY  | SGADIASLCR  |
| IRRLERRIYI | PLPSDTGRKL  | LFEINLN---  | SLKLSPNI IW | DQLVKKCDGY  | SGADIANVCR  |
| RRRFEKRIFI | PLPDIDARKK  | LIEKSME---  | GTPKSDEINY  | DDLAARTEGF  | SGADVVS LCR |
| EACMLPLRKL | KKNELLSVDS  | TKIKPVSIDD  | FTEAVKKVPP  | SLQK KELLYF | KNLVKEYNKQ  |
| EAALPIRQC  | T--DITNIQS  | S DIRPINKSD | FVKSLKQVKA  | TVTSKDLAGY  | FDWNNQFGSF  |
| EASLGPIRSL | QTADIATITP  | DQVRPIAYID  | FENAFRTVRP  | SVSPKDLELY  | ENWNKTFGCG  |
| EAALGPIRSI | QLMDISTITA  | EQVRPIAYID  | FQSAFLVVRP  | SVSQKDLELY  | ENWNKTFGCG  |
| EAALGPIRSI | SLSDIATIMA  | EQVRPILYSD  | FQEALKTVRP  | SVSSKDLELY  | EEWNKTFGCG  |
| EAVVGPLHAM | PATDLSAIMP  | SQLRPVTYQD  | FENAFCKIQP  | SISQKELDTY  | VEWNKMF GCS |
| DATMGPLREA | LKRGIDILTK  | DDMRLVTLQD  | FKDALQEV RP | SVSQNELGIY  | ENWNNQFGSL  |

|            |             |            |             |            |            |
|------------|-------------|------------|-------------|------------|------------|
| YASMAPLRSL | TPDQMEVIET  | HQLPAVTMDD | FKQALRVISK  | SVSSEDCKQF | EAWNEIYGVR |
| EAAMGPIRDI | G-DDIETIDK  | DDIRAVTVMD | FAEAARVVRP  | TVDDSQLDAY | AAWDKKFGCL |
| DAALGPIREL | KPEQVKNMSA  | SEMRNIRLSD | FTESLKKIKR  | SVSPQMLEAY | IRWNKDFGDT |
| DAALGPIREL | KPEQVKNMSA  | SEMRNIKLSL | FTESLKKIKR  | SLSPQMLEAY | IRWNKDFGDT |
| DAALGPIREL | KPEQVKNMAA  | SEMRNMKYSD | FLGSLKKIKC  | SVSHSTLESY | IRWNQDFGDT |
| DAALGPIREL | KPEQVRNMSA  | HEMRDIRISD | FLESCLKRIK  | SVSPQMLDQY | VRWNREYGDT |
| DAALEPIREL | NVEQVKCLDI  | SAMRAITEQD | FHSSLKRIRR  | SVAPQSLNSY | EKWSQDYGDI |
| EAAMMPIREL | GPQNILTIKA  | NQLRPLKYED | FKKAMTVIRP  | SLQKSKWDEL | EKWNEEFGSS |
| EAAMMPIREL | G-ANILTIQA  | NKVRSLRYDD | FRKSMAVIRP  | SLSKSKWEEL | ERWNSEFGSN |
| EAAMVPIREI | DRSKLSMTDG  | EKIRKIRASD | FDTALRTIRP  | STSQKIMSKL | SDFSRSFGC- |
| EAAMEPIRDL | G-DKLMFADF  | DKIRGIEIKD | FQNALLTIKK  | SVSSESLQKY | EEWSSKFGSN |
| DAAMGPLRNL | G-DALLTISA  | EMIPPISLNH | FKASLRTIRP  | SVSQEGIHRY | EEWNKQFGSQ |
| DALMOPVRKV | QSATHFKGDK  | LLEPVVCMDS | MLRSLATTRP  | TVNADDLLKV | KKFSEDFGQE |
| DALMOPVRKV | QSATHFKSDK  | LQEPVVCMDS | MLRSLATTRP  | TVNADDLLKV | KKFTDDFGQE |
| DALMOPVRKV | QSATHFKGDK  | LLEPKVSMAD | MLRSLASTKP  | TVNEQDLEKL | KKFTEDFGQE |
| DALMOPVRKV | QSATHFKGDK  | LLEPIVSMDS | MLRSLSNTKP  | TVNEQDLEKL | KKFTEDFGQE |
| DALMEPVRKV | QTATHFKSDK  | LFEPVVTMRD | MLKSLSRTPK  | TVNEDDLKKL | RKFTEDFGQE |
| DALMOPVRRV | QSATHFKGDK  | LANPPLSMQD | ISRSLASVKP  | TVNNTDLRL  | EAFKNDFGQD |
| DALMOPIRKI | QSATHFKADE  | LKEPDLTIKD | FLKAIKSTRP  | TVNEDDLLKQ | EQFTRDFGQE |
| DAIMEPVRRV | HTATHFKPED  | IMEPKLTVRD | FYSAVRKVKP  | TLNAGDIEKH | TQFTKDFGAE |
| DVLFEPVRKT | QDAMFFFAEK  | IIPPPITRTD | FEKVLARQRP  | TVSKSDLVDH | ERFTQEFGEE |
| DAVLEPVRRV | QIATKFKQQQ  | LELPQISAQD | FEIAIKKAKG  | TVGKDQLKDY | EKWTTEFGQD |
| EASYEPLRIA | QRATKFKGSM  | LKLQDVSIKH | FELALQSKCP  | SVSEKDIERQ | IETKKEFGQD |
| DAFMRPLKDL | RNAKYFKAQQ  | IILREVTYKD | FKASVKNCKP  | TVPSNWQQLY | KKFLLKYGHS |
| DAFMRPIQEL | QTTKKFQPKQ  | IILRKAIEKD | FKESIKNCKP  | TVSKKFLDYY | NKFLEKCGHV |
| DASMNGMRRK | IAGKTRDSKD  | DISDPVAMCD | FEEAIRKVQP  | SVSSSDIEKH | EKWLSEFGSA |
| DASMNGMRRK | IAGKTRDSKD  | EISDPVAMCD | FEEALAKVQK  | SVSPADIEKH | EKWQAEFGSA |
| DASLMAMRRR | IEGLTPESKE  | EMHMPPTMED | FEMALKKVKP  | SVSAADIERY | EKWIFEFGSC |
| DASLMAMRRR | IEGLTPESRE  | AMHMPPTMED | FEMALKKISK  | SVSAADIERY | EKWIFEFGSC |
| DASLMAMRRR | IEGLTPESRD  | EMHMPPTMED | FEIALKKVSK  | SVSAADIEKY | EKWIFEFGSC |
| DASLMAMRRR | IEGLTPESRD  | DMHMPPTMED | FEMALKKVKP  | SVSASDIEKY | EKWIFEFG-- |
| DASLMAMRRR | IEGLTPEPKD  | EMHMPPTMED | FETALKKVKP  | SVSAADLEKY | EKWIAEFGSC |
| DASLMAMRRR | INGLSPESKE  | ELQMPVTKGD | FELALKKIAK  | SVSAADLEKY | EKWMVEFGSA |
| DASLMAMRRR | INGLSPESKE  | ELQMPVTRGD | LELALKKIAK  | SVSAADLEKY | EKWMVEFGSA |
| DASLMAMRRR | INGLTPESKE  | ELQMPVTKGD | FELALKKISK  | SVSAADLEKY | EKWMVEFGSA |
| DASMMAMRRR | IQGLSPESKD  | ELQMPVTMED | FELALKKISK  | SVSAADLEKY | ESWMSEFGSV |
| EASMMSMRRK | IAGLTPEATE  | EVDLPVSNKD | FNEAMSRCKP  | SVSRADLDKY | EKWMREFGSS |
| DAAMNGMRRV | VAGKTPAREA  | GMTEPITSDD | FREALRKINP  | SVSKEDIKRH | EEWLSVFGST |
| DAAMMTMRRF | MEEMDKTAAE  | IGKQPITMDD | FLNAVRNVPS  | SINVEQIKKF | EKWKKEFEVN |
| DAAMMTMRRV | MEEMDKSAAE  | ISKQPITMND | FLSAVKNVPS  | SINVEQIQKF | EAWKKEFETN |
| DAAMMTMRRF | MKEADKTAAE  | IGRQPINMSD | FLAAMTKVPS  | SINADNIKKF | EAWKKEFELN |
| DASMMAMRRV | ISGRTPDRRE  | EVDQPITLQD | FQDARLRTKK  | SVSADDVARF | EKWMEEYGSC |
| DAAMMPMRRV | IADRSPAKEG  | GKMPVTMND  | FEDALKKIQP  | SVSQSSIKQF | EKWAEELGSV |
| DAAMMPMRKL | IADRTPAKEG  | GKMAVVTMRD | FEEAAKKIQP  | SVSQSSLKQF | ERWSEELGSV |
| EAAMQPLRRL | MSVLEAREEL  | PEVGPLKPED | IEVALRNTRP  | SAH-LHAHRY | EKFNQDYGSQ |
| EAAMQPLRRL | MSVLEGRDEL  | PEVGPVTTED | IELALRNTRP  | SAH-LHVHRY | EKFNQDYGSH |
| EAAMQPLRRT | LAILEDREDEL | PKIGPILPED | IDRALSNTTRP | SAH-LHAHLY | DKFNDDYGSQ |
| EAAMRPVRKI | FDALENHLPR  | IQLDIVTTAD | FLDVLTHTKP  | SAK-NLAQRY | SDWQREFESV |

|            |            |            |            |            |             |
|------------|------------|------------|------------|------------|-------------|
| EAAMRPVRKI | FVLENNLPG  | IQLDTVTTQD | FLDVLAHTKP | SAK-NLTERY | LAWQEKFESV  |
| EAAMRPVRKV | FDALENHLAA | VHLDMITTAD | FLDVIAHTKP | SAK-KLSQKY | TAWQREFESV  |
| EAAMRPVRKI | FDALENHLPV | ISLETVTTSD | FSEVLAHTKP | SAK-SLAEKY | SAWQNEFESV  |
| EAAMRPVRKI | FDALENHMPV | IELETVTTAD | FLDVIVHTKP | SAR-CLMDRY | TAWKEYESV   |
| EAAMRPLRRL | MSKLELDNIK | VELGPVTVED | ARAALEVTKP | SAR-LHEDKY | RKFNDYDYGQL |
| EAMMRPIRLM | IEKLEGASGV | VQRPVITMQD | IMASVACTQS | SVQQSDLSKF | EAWARKYGSG  |
| EAVMRPIRLL | IEKLERAGGL | LQRPQVTIED | IMASVACTQS | SVQRSDLEKF | DAWAKKHGSG  |
| EAMMRPVKRL | ISQLEAASEP | LRPPAATLED | VQASVACTRS | SVRVADLDKY | DVWTREHGSG  |
| EAAMKPLRRL | INQIEKSPQE | VKPDPVTNED | IVEALKTTKP | SSF-IKTQAY | EKWAKEHGSV  |
| EAAMKPLRRL | LSQIEDIYDD | VRPGPVTETD | FAEAMNQVKP | SPS-VFENQY | LKWEKESGSC  |
| EISMHRVRCR | TKIGDRSLLA | KESPAAIEAN | VEKAFRQVRP | LGQ-KLLAKH | EQWQQENGSG  |
| EAFMPMRRK  | LMKEGGFLAQ | ESDIPLTQKD | FEEALRNVNK | SVSNDDLENF | EKWMAEFGSV  |
| EASMLPMRRK | LKEEGGFYED | ISNVPLEQKD | FDEALKIVNK | SVSTEYLKEY | ENWMKDFGAG  |
| TAAINVLRRY | DTKSLRGMES | LKAELVRNID | FEAALQAVSP | SAGPDTMLKC | KEWCDSFGAM  |
